1 **Title**

2 Female gender, depressive symptoms, manual job, and higher physical disability predict  
3 long term low back pain persistence

4

5 **Short title:**

6 Course and prognosis of long-term low back pain

7

8 **Authors:**

9 Luís Antunes Gomes<sup>1,2\*</sup>, Ana Maria Rodrigues<sup>1,2,3</sup>, Jaime C. Branco<sup>1,2,4</sup>, Helena

10 Canhão<sup>1,2</sup>, Eduardo Brazete Cruz<sup>1,5</sup>

11

12 <sup>1</sup>Comprehensive Health Research Centre (CHRC), Portugal

13 <sup>2</sup>EpiDoC Unit, CEDOC, NOVA Medical School, NOVA University of Lisbon, Lisbon, Portugal

14 <sup>3</sup>Unidade de Reumatologia, Hospital dos Lusíadas, Lisbon, Portugal

15 <sup>4</sup>Serviço de Reumatologia do Hospital Egas Moniz - Centro Hospitalar Lisboa Ocidental

16 (CHLO-EPE), Lisbon, Portugal

17 <sup>5</sup>Physical Therapy Department, School of Health, Polytechnic Institute of Setúbal,

18 Setubal, Portugal

19

20 **\*Corresponding author:**

21 Email: [ftluisgomes@gmail.com](mailto:ftluisgomes@gmail.com)

## 22 **ABSTRACT**

23 **Background:** Low Back Pain (LBP) is a long-term health condition with distinct clinical  
24 courses. The characterization of these courses together with the identification of  
25 prognostic factors of a persistent disabling LBP course has the potential to enable a  
26 better identification of patients in high-risk and ultimately allow the development of  
27 personalized interventions to change their long-term prognosis. This study aimed to  
28 assess the course of chronic LBP (CLBP) over 5 years in a large population-based study,  
29 its cumulative impact on disability and health-related quality of life (HRQoL) and the  
30 indicators for persistent CLBP course.

31 **Material and methods:** Active CLBP participants were identified from a representative  
32 sample of 10,661 adults randomly recruited from the dwelling population of EpiDoC.  
33 Pain, disability and HRQoL were assessed at three time-points. According to their pain  
34 symptoms over time, participants were classified as having a persistent or relapsing pain  
35 course. A General Linear Model was used to compare mean differences between and  
36 within groups. The relation between baseline variables and persistent CLBP was  
37 modulated through logistic regression.

38 **Results:** Among the 1,201 adults with active CLBP at baseline, 634 completed the three  
39 time-points of data collection (52.8%) and 400 (63.1%) were classified as having a  
40 persistent course. Statistically significant interactions were found between the group  
41 and time on disability ( $F(2,126) = 23.78, p < 0.001$ ) and HRQoL ( $F(2,125) = 82.78, p < 0.001$ ).  
42 In the adjusted model, the persistent course was associated with the disability level (OR:  
43 1.84, CI95% 1.4 to 2.4), presence of depressive symptoms (OR: 1.96, CI95% 1.2 to 3.2),  
44 female gender (OR: 1.9, CI95% 1.26-2.87), and having a manual job (OR: 1.46, CI95%

45 1.02 to 2.1).

46 **Conclusion:** In the long-term, CLBP patients have distinct clinical courses. Being female,  
47 presenting depressive symptoms, having a manual job and a higher disability at baseline  
48 predict a CLBP persistent outcome.

49

## 50 Introduction

51 Non-specific Low Back Pain (LBP) is one of the most common health problems in  
52 societies and is strongly associated with poor self-rated general health [1-4]. It causes  
53 severe long-term pain, disability, work absenteeism, and an increased use of healthcare  
54 services [1,2].

55 LBP is traditionally divided into acute (pain of less than 6 weeks), sub-acute (6 to 12  
56 weeks) or chronic (more than 12 weeks) symptom duration [5]. The typical course of  
57 acute is initially favorable, i.e., is characterized by a marked reduction in the mean of  
58 pain and disability in the first 6 weeks [6]. However, from this point forward, the  
59 improvement slows down and the probability of developing a persistent and disabling  
60 back pain condition (CLBP – Chronic Low Back Pain) increases for approximately 40% of  
61 the patients [6,7]. Some of these patients will recover, but a minority will develop a  
62 persistent disabling condition. This minority is responsible for most of the social and  
63 health costs associated with LBP [8], to which absenteeism and reduced productivity  
64 costs must be added [9].

65 To better address the individual consequences of persistent disabling LBP on patients  
66 and eventually define more appropriate treatment solutions, an improved  
67 understanding of its long-term prognosis is needed. Traditionally, LBP episodes have  
68 been understood and examined as episodic, recurrent but unrelated [10,11]. Thus, most  
69 of the published research is focused on the evaluation of a single episode or presence  
70 of pain or disability at specific time-points. It is, therefore, often difficult to know  
71 whether a particular study includes individuals with an initial episode of LBP or/and  
72 individuals with an exacerbation of a recurrent LBP condition [12,13].

73 The population-based studies with long-term follow-up (5 to 10 years) published to date  
74 have shown that LBP is a persistent long-term condition with a variable clinical course  
75 and multiple interrelated episodes [14-21]. Despite differences in the case definition or  
76 in the assessment time-points, only 6 to 14% of adults enrolled in these studies reported  
77 pain at all specific time-points of the follow-up [18,19]. In contrast, 23 to 35% of the  
78 population studied reported that they were "painless at the time of evaluation" [16-18]  
79 or had "no day of pain during the previous year" [20]. These results suggest that there  
80 is a considerable percentage of individuals reporting pain at a given time who fully  
81 recover, while others maintain some level of pain and disability over time, with a small  
82 subgroup reporting persistent and potentially disabling pain [16,18-20]. Consequently,  
83 the clinical course based on the population mean may not adequately reflect the within-  
84 person variation in LBP experienced by individuals, opening the possibility of classifying  
85 LBP in clinically relevant subgroups [16,19].

86 The Epidemiology of Chronic Diseases Cohort Study (EpiDoC), being a population-based  
87 study with prolonged follow-up [22-24], produced a set of data that could help identify  
88 distinct LBP courses and investigate its impact on disability and quality of life. On the  
89 other hand, the presence of distinct clinical courses among LBP patients opens the  
90 possibility of identifying prognostic indicators for a persistent LBP course. Although a set  
91 of indicators has been associated with the development of persistent and disabling pain  
92 [25-30], the majority have emerged from studies that have evaluated pain at a single  
93 point of time, with follow-up limited to 1 year [31,32]. The identification of predictors of  
94 more disabling LBP course might allow healthcare professionals to better identify the  
95 patients at high-risk of persistent disabling symptoms, and eventually change their long-

96 term prognosis through forms of treatment that best fit and respond to their  
97 characteristics [16].

98 The aim of this study was to investigate the presence of different LBP course patterns  
99 across 5 years, to examine its cumulative impact on disability and HRQoL and to compare  
100 the contribution of socio-demographic, lifestyle, psychosocial and symptom-related  
101 indicators to persistent LBP, using data from the EpiDoC.

102

## 103 **Materials and Methods**

104 This study used a longitudinal analysis of active CLBP patients' data from the EpiDoC.  
105 The EpiDoC began with the EpiDoC 1 study (EpiReumaPt) in 2011-13. EpiReumaPt was a  
106 population-based study with a representative sample of the Portuguese population,  
107 comprised of 10.661 non-institutionalized adults ( $\geq 18$  years), living in Portugal and able  
108 to speak and read the Portuguese language [22,23]. From there, and over a 5-year  
109 period, two subsequent time-points of data collection (every 18 months) have been  
110 completed, using data based on the same participants [24]. The detailed procedures for  
111 the study design and sample selection and recruitment are published elsewhere [23].  
112 Local and regional ethical committees granted ethical approval for this study. All  
113 patients gave informed consent after receiving written and oral information about the  
114 study [22,23].

115 This study's sample consists of all the individuals recruited under the EpiReumaPt study  
116 who self-reported active CLBP on the day of the interview [4]. Active CLBP was defined  
117 as pain located in the lower back, between the lower thorax and the gluteal folds, that  
118 was present most of the time for a minimum period of 90 days, and without a specific

119 cause. Individuals with a diagnosis of other spinal pain (neck or dorsal back pain) or with  
120 LBP lasting less than 90 days were excluded [4].

121 For the purposes of this study, a more stringent case definition was used. Participants  
122 who reported “no pain/discomfort” at baseline when answering to question 4 of the  
123 Euroqol, 5 dimensions, 3 levels (EQ-5D-3L) (*Regarding pain/discomfort please indicate*  
124 *which statement best describes your health today?*), were excluded. Finally, only those  
125 participants who participated in all the time-points of data collection (baseline and time-  
126 points 2 and 3) were included in the final analysis.

127 At baseline, data were collected in face-to-face interviews by trained research assessors  
128 (RA) based on a standardized questionnaire which included self-report instruments of  
129 disability, health-related quality of life (HRQoL), and anxiety and depressive symptoms.

130 At the follow-up time-points, the RA collected the same self-report measures of  
131 disability and HRQoL through telephone interviews. To prevent withdrawals, when a  
132 participant was not available, a maximum of 6 additional attempts were made at  
133 different times [24].

134 CLBP course across 5 years was represented by a three-digit variable based on the  
135 participants’ answer to question 4 of the EQ-5D-3L: from left to right, the first digit  
136 stands for CLBP status at baseline, the second for the pain status at time-point 2, and  
137 the third for the pain status at time-point 3.

138

## 139 **Outcome Measures**

140 The primary outcome considered in this study was “persistent LBP” defined as the  
141 presence of moderate or extreme pain/discomfort (question 4 of the EQ-5D-3L) at  
142 baseline and in all the subsequent time-points of data collection. Additionally, disability

143 status and HRQoL were evaluated through the Portuguese versions of the Health  
144 Assessment Questionnaire (HAQ) and the EQ-5D-3L [33,34]. The weight applied to the  
145 severity states of the EQ-5D-3L was based on the Portuguese valuation study of the EQ-  
146 5D-3L [35].

147

## 148 **Prognostic Indicators**

149 The selection of potential prognostic indicators for the persistent course pattern of CLBP  
150 was based on previous published literature [25-30] and covered four domains: socio-  
151 demographic (age, gender, employment status, marital status, and education), lifestyle  
152 (body mass index, physical exercise, and its frequency), psychosocial (anxiety and  
153 depression) and symptom-related indicators (disability and HRQoL).

154 Anxiety and depression were measured through the Portuguese version of the Hospital  
155 Anxiety and Depression Scale (HADS) which is divided into an Anxiety subscale (HADS-  
156 A) and a Depression subscale (HADS-D) (the cut-off used for positive anxiety and  
157 depression symptoms was >11) [36,37].

158

## 159 **Statistical Analysis**

160 All data analyses were performed using SPSS, Version 24.0 for OX Yosemite (SPSS Inc.,  
161 Chicago, IL).

162 Firstly, since complete case analysis may lead to biased results because data are unlikely  
163 to be missing completely at random [38], nonresponse bias was assessed by comparing  
164 the characteristics of the respondent and non-respondent samples at baseline (time-  
165 point 1). A chi-square test and a student's *t*-test were used to compare the demographic



166 and clinical data of responders and non-responders, as appropriate.

167 Secondly, and as different CLBP courses were expected, descriptive statistics were  
168 planned for different CLBP groups. Baseline characteristics were then compared using  
169 the chi-square test and independent *t*-test for categorical and continuous variables,  
170 respectively. Differences between groups on disability and HRQoL, over time, were  
171 examined using repeated measures analysis of variance (General Linear Model  
172 procedure).

173 Finally, to identify prognostic indicators, associations between the baseline variables  
174 and the persistent course of CLBP were modelled through binary logistic regression  
175 analysis. A multiple logistic regression was used through backward conditional  
176 procedure. All comparisons were adjusted for variables that reveal statistically  
177 significant differences in bivariate analysis ( $p < 0.20$ ). The non-significant variable with  
178 the highest *p*-value was removed in a stepwise manner until all variables had  $p < 0.05$ .

179 The results are presented as crude and adjusted odds ratios (OR) with 95% confidence  
180 intervals.

181 The discriminative ability of the model was assessed through the area under the receiver  
182 operating characteristic curve (AUC), ranging from 0.5 (no discrimination) to 1.0 (perfect  
183 discrimination) [39]. All *p* values are two-sided, and the significance level was 5%.

184

## 185 **Results**

186 Of the 1.201 selected participants with active CLBP at baseline (time-point 1), 634  
187 (52.8%) completed all the time-points of data collection (complete data on main  
188 outcomes - EQ5D index and HAQ). Non-responders at time-point 2 and/or 3 were lost

189 due to unsuccessful contact and for other reasons (participants refused to sign the  
190 consent form for follow-up, expressed the wish to leave the study, had an invalid contact  
191 or have died) (Fig 1).

192

193 **Fig 1. Flow diagram of recruitment**

194

195 At baseline, no statistically significant differences in socio-demographic and clinical  
196 characteristics were found between responders and non-responders, except for HRQoL  
197 (EQ-5D-3L index,  $p=0.005$ ), with responders reporting a statistically significantly lower  
198 HRQoL. The participants were aged  $61.6 \pm 13.6$  years, predominantly females (78.4%)  
199 and with a low educational level (64.4%). Considering the 3 time-points of data  
200 collection, 400 (63.1%) participants were classified as having a persistent LBP course and  
201 234 (36.9%) as having a relapsing LBP course. Of the 234 participants classified with a  
202 relapsing LBP course, 63 (26.9%) reported no pain in time-points 2 and 3 (pain/no  
203 pain/no pain), 49 (20.9%), an intermittent pattern of pain (pain/no pain/pain), and 122  
204 (52.1%), reported no pain only in the third time-point (pain/pain/no pain). The  
205 characteristics of the relapsing and persistent subgroups are presented in Table 1.

206

207 **Table 1.** Socio-demographic characteristics of the participants at baseline. Total sample and groups  
208 (n=634).

|                                                           | Total Sample<br>(n=634) | Relapsing LBP Course<br>(n=234) |       | Persistent LBP Course<br>(n=400) |       |
|-----------------------------------------------------------|-------------------------|---------------------------------|-------|----------------------------------|-------|
|                                                           | n (%)                   | n                               | (%)   | n                                | (%)   |
| <b>Age (years) (Mean <math>\pm</math> SD<sup>1</sup>)</b> |                         | 59.6 $\pm$ 15.1                 |       | 62.7 $\pm$ 12.7                  |       |
| <b>Female gender</b>                                      | 497 (78.4%)             | 158                             | 31.79 | 339                              | 68.21 |
| <b>Educational level (%) (n = 634)</b>                    |                         |                                 |       |                                  |       |
| 0–4 years                                                 | 408                     | 128                             | 31.37 | 280                              | 68.63 |
| 5–9 years                                                 | 113                     | 56                              | 49.56 | 57                               | 50.44 |
| 10–12 years                                               | 65                      | 23                              | 35.38 | 42                               | 64.62 |
| >12 years                                                 | 37                      | 22                              | 59.46 | 15                               | 40.54 |
| <b>Marital status (%)</b>                                 |                         |                                 |       |                                  |       |

|                                                    |             |       |             |       |             |
|----------------------------------------------------|-------------|-------|-------------|-------|-------------|
| Single                                             | 41 (6.5%)   | 41    | 41.46       | 24    | 58.54       |
| Married                                            | 400 (63.1%) | 400   | 36.00       | 256   | 64.00       |
| Divorced                                           | 38 (6.0%)   | 38    | 39.47       | 23    | 60.53       |
| Widower                                            | 144 (22.7%) | 144   | 37.50       | 90    | 62.50       |
| Consensual union                                   | 11 (1.7%)   | 11    | 36.36       | 7     | 63.64       |
| <b>Anxiety positive symptoms</b>                   | 194 (30.6%) | 59    | 30.4%       | 135   | 69.6%       |
| <b>Depressive positive symptoms</b>                | 135 (21.3%) | 28    | 20.7%       | 107   | 79.3%       |
| <b>Employment status (%)</b>                       |             |       |             |       |             |
| Full-time employed                                 | 123 (19.4%) | 57    | 46.34       | 66    | 53.66       |
| Part-time employed                                 | 13 (2.1%)   | 6     | 46.15       | 7     | 53.85       |
| Domestic worker                                    | 61 (9.6%)   | 18    | 29.51       | 43    | 70.49       |
| Unemployed                                         | 49 (7.7%)   | 22    | 44.90       | 27    | 55.10       |
| Retired                                            | 344 (54.3%) | 117   | 34.01       | 227   | 65.99       |
| Student                                            | 2 (0.3%)    | 1     | 50.00       | 1     | 50.0        |
| Temporary disabled                                 | 21 (3.3%)   | 7     | 33.33       | 14    | 3.5         |
| Other <sup>2</sup>                                 | 21 (3.3%)   | 6     | 2.6         | 15    | 3.8         |
| <b>Manual worker (Yes)</b>                         | 397 (62.6%) | 133   | 56.8        | 264   | 66.0        |
| <b>BMI<sup>(3)</sup> (kg/m<sup>2</sup>) (%)</b>    | n=588       | n=221 |             | n=367 |             |
| Underweight (<18.50 kg/m <sup>2</sup> )            | 1 (0.2%)    | 1     | 100         | 0     | 0           |
| Normal (18.5–24.99 kg/m <sup>2</sup> )             | 162 (25.6%) | 162   | 43.21       | 92    | 56.79       |
| Overweight (15.00–29.99 kg/m <sup>2</sup> )        | 234 (36.9%) | 234   | 38.46       | 144   | 61.54       |
| Obese (≥30.00 kg/m <sup>2</sup> )                  | 191 (30.1%) | 191   | 31.41       | 131   | 68.59       |
| <b>Physical exercise (%) (Yes)</b>                 | 134 (21.1%) | 51    | 38.1%       | 83    | 61.9%       |
| Average time per day (minutes)                     |             |       |             |       |             |
| ≤45min                                             | 63 (47%)    | 22    | 34.9%       | 41    | 65.1%       |
| >45 min                                            | 71 (53%)    | 29    | 40.9%       | 42    | 59.2%       |
| Average time per week (minutes)                    |             |       |             |       |             |
| ≤150min/week                                       | 61 (45.5%)  | 22    | 36.1%       | 39    | 63.9%       |
| >150 min/week                                      | 73 (54.5%)  | 29    | 39.7%       | 44    | 60.3%       |
| <b>Pain</b>                                        |             |       |             |       |             |
| Moderate pain or discomfort                        | 234 (37%)   | 209   | 89.3%       | 25    | 10.7%       |
| Extreme pain or discomfort                         | 400 (63%)   | 338   | 84.5%       | 62    | 15.5%       |
| <b>Disability (HAQ score, n=634)<sup>(4)</sup></b> |             |       | 0.76 ± 0.69 |       | 1.13 ± 0.70 |
| <b>HRQoL (EQ-5D-3L index, n=634)<sup>(5)</sup></b> |             |       | 0.52 ± 0.20 |       | 0.43 ± 0.20 |

209  
210 <sup>(1)</sup> SD: Standard deviation; <sup>(2)</sup> Other: Do not know/do not answer; <sup>(3)</sup> BMI: Body Mass Index; <sup>(4)</sup> HAQ: A lower HAQ  
211 disability score indicates better function; <sup>(5)</sup> HRQoL EQ-5D-3L index: "1" corresponds to the best possible health, and  
212 "0" to death. Negative values correspond to states of health considered to be worse than death.  
213  
214 Statistically significant differences were found between groups for age ( $p=0.008$ ),  
215 educational level ( $p=0.001$ ), HRQoL (EQ-5D-3L Index,  $p=0.005$ ) and disability ( $p=0.005$ ).  
216 The participants in the persistent subgroup are older and less educated, have higher  
217 levels of disability and lower HRQoL (Table 2). Moreover, statistically significant  
218 associations were found between gender ( $p\leq 0.005$ ), anxiety ( $p=0.024$ ) and depressive  
219 symptoms ( $p\leq 0.005$ ), and the type of LBP condition (relapsing or persistent).

220

221 **Table 2.** Health Related Quality of Life and functional status at the different time-points, in "relapsing"  
222 and "persistent" LBP subgroups (n=634).

|                               |                           | Mean ± SD<br>Relapsing CLBP<br>course | Mean ± SD<br>Persistent CLBP<br>course | p-value |
|-------------------------------|---------------------------|---------------------------------------|----------------------------------------|---------|
| Time-point<br>1<br>(Baseline) | EQ-5D-3L index<br>(n=634) | 0.52 ± 0.19                           | 0.43 ± 0.19                            | < .0005 |
|                               | Score HAQ (n=634)         | 0.76 ± 0.69                           | 1.13± 0.70                             | < .0005 |
| Time-point<br>2               | EQ-5D-3L index<br>(n=634) | 0.58 ± 0.28                           | 0.30± 0.23                             | < .0005 |
|                               | Score HAQ (n=631)         | 0.38 ± 0.55                           | 0.69 ± 0.80                            | < .0005 |
| Time-point<br>3               | EQ-5D-3L index<br>(n=634) | 0.70 ± 0.32                           | 0.34 ± 0.24                            | < .0005 |
|                               | Score HAQ (n=631)         | 0.55± 0.60                            | 1.27± 0.70                             | < .0005 |

223

224 <sup>(1)</sup> **HAQ:** A lower HAQ disability score indicates better function; <sup>(2)</sup> **HRQoL EQ-5D-3L index:** "1" corresponds  
225 to the best possible health, and "0" to death. Negative values correspond to states of health considered  
226 to be worse than death.

227

## 228 **Course of disability and HRQoL between groups, overtime**

229 HRQoL and disability status have improved over time in the "relapsing group", whereas  
230 in the "persistent group" they have remained relatively stable (Table 2). Statistically  
231 significant interactions were found between the group (relapsing or persistent) and time  
232 (time-point 1 to 3) on disability ( $F(2,1258)=23.779, p<0.001$ ), and HRQoL (EQ-5D-3L  
233 index), ( $F(2, 1252)=82.779, p<0.001$ ). At any time-point there were statistically  
234 significant differences on disability ( $p<0.005$ ) and HRQoL (EQ-5D-3L index,  $p<0.005$ ),  
235 between groups. Moreover, and over time, an opposite pattern of impact was found  
236 between groups; comparing to baseline, HRQoL was statistically significantly higher  
237 ( $p<0.001$ ) and disability significantly lower ( $p<0.001$ ) at time-point 3 in the relapsing

238 group, whereas HRQoL statistically significantly decreased ( $p<0.001$ ) and disability  
239 significantly increased ( $p<0.001$ ) in the persistent group.

240

## 241 Prognostic Indicators for the persistent CLBP course

242 After adjustments, a persistent course of moderate to extreme pain or discomfort was  
243 associated with the disability score at baseline, positive depressive symptoms, being  
244 female and having a manual job. Participants with higher disability scores at baseline  
245 had a higher OR for persistence of pain (1.84, CI95% 1.4-2.4,  $p=0.001$ ). Participants with  
246 positive depressive symptoms, manual workers and females have also a higher  
247 probability of developing a persistent CLBP course than non-depressive participants (OR:  
248 1.96, CI95% 1.2-3.2,  $p=0.007$ ), non-manual workers (OR: 1.46, CI95% 1.02-2.1,  $p=0.04$ ),  
249 and males (OR: 1.9, CI95% 1.26-2.87,  $p=0.002$ ) (Table 3).

250

251 **Table 3.** Odds Ratios (95% Confidence Intervals) for the associations between prognostic indicators and  
252 the persistent course of CLBP (n=400).

| Prognostic indicators                                 | Persistent CLBP Course |            |         |             |           |         |
|-------------------------------------------------------|------------------------|------------|---------|-------------|-----------|---------|
|                                                       | Crude OR               | CI 95%     | p-value | Adjusted OR | CI 95%    | p-value |
| <b>Socio-demographic Indicators</b>                   |                        |            |         |             |           |         |
| Age (continuous)                                      | 1.02                   | 1.01-1.03  | 0.006** |             |           |         |
| Gender (ref male)                                     | 2.67                   | 1.82-3.93  | 0.001** | 1.9         | 1.26-2.87 | 0.002   |
| Educational Level (ref Secondary or higher Education) | 1.45                   | 0.94-2.22  | 0.093*  |             |           |         |
| Marital Status (ref living alone)                     | 1.10                   | 0.79-1.54  | 0.567   |             |           |         |
| <b>Psychosocial indicators</b>                        |                        |            |         |             |           |         |
| Anxiety positive symptoms (Ref no)                    | 1.51                   | 1.05-2.17  | 0.025** |             |           |         |
| Depressive positive symptoms (Ref no)                 | 2.69                   | 1.71-4.23  | 0.001** | 1.96        | 1.21-3.18 | 0.007   |
| Employment status (ref working)                       | 1.27                   | 0.90-1.80  | 0.175*  |             |           |         |
| Manual worker (Ref no)                                | 1.70                   | 1.21-2.40  | 0.002** | 1.46        | 1.02-2.1  | 0.040   |
| <b>Lifestyle Indicators</b>                           |                        |            |         |             |           |         |
| BMI (Ref Underweight/normal weight)                   | 1.44                   | 0.99-2.08  | 0.055*  |             |           |         |
| Physical exercise (Ref yes)                           | 1.06                   | 0.72- 1.58 | 0.756   |             |           |         |
| <b>Symptom-related Indicators</b>                     |                        |            |         |             |           |         |
| Pain (Question 4- EQ-5D-3L) (Ref Moderate pain)       | 1.53                   | 0.93-2.52  | 0.091*  |             |           |         |
| Disability (HAQ <sup>4</sup> , 0-24)                  | 2.19                   | 1.71-2.90  | 0.001** | 1.84        | 1.4-2.4   | 0.001   |
| HRQoL (EQ5D <sup>5</sup> Index, 0-1)                  | 0.74                   | 0.03-0.19  | 0.001** |             |           |         |
| <b>Area Under the Curve (AUC)</b>                     |                        |            |         | 0.70        | 0.68-0.74 | 0.001   |

253

254 \* $P<0.2$ ; \*\* $P<0.05$ ; \*\*\* $P<0.01$ .

255 <sup>1</sup> **OR**: Odds Ratio; <sup>2</sup> **CI**: Confidence Intervals; **BMI**: Body Mass Index; <sup>(4)</sup> **HAQ**: A lower HAQ disability score  
256 indicates better function; <sup>(5)</sup> **HRQoL EQ-5D-3L index**: “1” corresponds to the best possible health, and “0”  
257 to death. Negative values correspond to states of health considered to be worse than death.

258

## 259 **Discussion**

260 The aim of this study was to investigate the presence of different LBP symptoms’ courses  
261 during a follow-up period of 5 years, to examine its cumulative impact on disability and  
262 HRQoL and to quantify the contribution of different prognostic indicators in predicting  
263 the long-term persistence of symptoms. To our knowledge, this is the first large  
264 prospective study that addresses the long-term course and prognosis of a restricted  
265 sample of active CLBP patients. Its results provide evidence for different symptoms’  
266 courses among people classified as chronic patients according to the traditional  
267 temporal categorization of LBP, suggesting that classifying LBP simply as acute or chronic  
268 is insufficient [5-17], and supporting the current understanding of LBP as a relapsing  
269 condition of interrelated episodes of pain [11,14,18-20,40].

270 In this study, 26.9% of participants reported at least one time-period of complete  
271 remission of LBP symptoms. This result is consistent with other long-term population  
272 studies’ findings that reported values of pain-free people in all follow-up points between  
273 23 and 35% [18-20]. Contrary to previous studies, the proportion of participants that  
274 had reported a persistent symptoms’ course at all follow-up points (63.1%) was  
275 substantially higher, with values ranging from 6 to 29% [18-20]. These differences might  
276 be explained in part by differences in sample characteristics [7], or the long-standing  
277 LBP definition used and data collection methods [18-20,41]. In this study, and since no  
278 questions were made to participants regarding their LBP symptoms between time-

279 points, it is possible that the persistent group includes people with continuous mild pain  
280 with low impact and people with a fluctuating symptoms course that varies between  
281 severe pain episodes with a large impact on their live and pain-free periods [15].

282 The results obtained regarding the course of disability and HRQoL seem to support this  
283 relapsing course of LBP symptoms. Despite statistically significant differences between  
284 groups at all follow-up time-points, both groups share a similar relapsing pain pattern  
285 over time. Nevertheless, it is important to highlight that statistically significant  
286 differences found between the baseline and time-point 3 indicate that disability  
287 decreases over time in the relapsing group and increases over time in the persistent  
288 group. Comparisons of this study's findings with other studies are difficult since those  
289 designed to describe the long-term course of disability and/or HRQoL are rare.

290 The present study explored potential prognostic indicators for persistent LBP. Although  
291 there is a vast amount of studies dedicated to risk factors for the onset of LBP or  
292 concerned with the transition of acute to CLBP, few studies investigated prognostic  
293 indicators for persistent CLBP over periods of more than 1 year. In this study, being  
294 female, have a manual job, presenting positive depressive symptoms, and reporting  
295 disability, increases the chances of a persistent long-lasting LBP. These indicators are  
296 consistent with findings reported in other studies [42-46].

297 Overall, the four indicators identified show a moderate ability to distinguish between  
298 relapsing and persistent courses (AUC 0.70). This result limits the capacity of these  
299 indicators to identify at presentation patients who are at risk for persistent disabling  
300 symptoms, and suggests that other potential prognostic factors (e.g., physical, or  
301 psychosocial) should be considered to predict persistent LBP.

302

### 303 **Strengths and Limitations**

304 Strengths of the current study include its long-term prospective design, the large sample  
305 size, data on the long-term impact of persistent versus relapsing CLBP courses on  
306 disability and HRQoL and the identification of prognostic indicators for the persistent  
307 subgroup.

308 Nevertheless, some methodological limitations must be considered. First, only 52.8% of  
309 the baseline sample responded to both follow-ups. Although participants included in  
310 this study were similar to those lost, except for HRQoL, the possibility of selection bias  
311 and residual confounding cannot be ruled out.

312 Another limitation already mentioned was the lack of information regarding LBP  
313 symptoms between data collection periods. Future studies should seek to enroll patients  
314 with an identical starting point of LBP symptoms' and follow them more frequently over  
315 time, to allow a better understanding on whether a certain moment of pain is due to a  
316 recurrence episode of pain or a persistent pain course. This distinction will make it  
317 possible to better distinguish different courses of pain among CLBP patients and  
318 potentiate the design of specific interventions whether to reduce the number of  
319 recurrences, in patients with relapsing course, or to promote self-management in  
320 patients with a persistent course. Furthermore, and although positive depressive  
321 symptoms were significantly associated with persistent LBP, not all potentially  
322 important psychological constructs were included in the present study. For example,  
323 fear of pain, catastrophizing [47], and illness perceptions were found to be the strongest  
324 predictors of poor prognosis in previous research [48].



325

## 326 **Conclusions**

327 The results of this study provide evidence on the long-term course of back pain and  
328 suggested that people with CLBP might have different clinical courses ahead and  
329 different prognosis in the long-term. It also provides relevant information about how  
330 persistent CLBP might affect disability and HRQoL over time. Depressive and female  
331 patients that have a manual job and report disability, have higher chances to develop a  
332 persistent long-lasting LBP.

333

## 334 **Acknowledgments**

335 The authors team wish to acknowledge the contribution of Professor Carla Nunes for  
336 the conceptualization and formal analysis of the current study.

337

338

## 339 References

- 340 1. Global Burden of Disease, Injury Incidence, Prevalence Collaborators. Global, regional,  
341 and national incidence, prevalence, and years lived with disability for 310 diseases and  
342 injuries, 1990–2015: a systematic analysis for the Global Burden of Disease Study 2015.  
343 *Lancet* 2016;388:1545–602.
- 344 2. Vos T, Flaxman AD, Naghavi M, et al. Years lived with disability (YLDs) for 1160 sequelae  
345 of 289 diseases and injuries 1990–2010: a systematic analysis for the Global Burden of  
346 Disease Study 2010. *Lancet*. 2012;380(9859):2163–96.
- 347 3. Branco J, Rodrigues AM, Gouveia N, et al. Prevalence of rheumatic and musculoskeletal  
348 diseases and their impact on health related quality of life, physical function and mental  
349 health in Portugal: results from EpiReumaPt – a national health survey. *RMD Open*  
350 2016;2:e000166. doi:10.1136/rmdopen-2015-000166.
- 351 4. Gouveia N, Rodrigues A, Eusébio M, et al. Prevalence and social burden of active chronic  
352 low back pain in the adult Portuguese population: results from a national survey.  
353 *Rheumatology International* 2016;36(2):183–97.
- 354 5. van Tulder M, Becker A, Bekkering T, et al. European guidelines for the management of  
355 acute nonspecific low back pain in primary care. *COST Action B13* 2001.
- 356 6. Costa LC, Maher CG, Hancock MJ, et al. The prognosis of acute and persistent low-back  
357 pain: a meta-analysis. *CMAJ* 2012;184(11):E613–24.
- 358 7. Costa LC, Maher CG, McAuley JH, et al. Prognosis for patients with chronic low back pain:  
359 inception cohort study. *BMJ* 2009;339:b3829.
- 360 8. Global Burden of Disease 2015 DALYs and HALE Collaborators. Global, regional, and  
361 national disability-adjusted life years (DALYs) for 306 diseases and injuries and healthy  
362 life expectancy (HALE) for 188 countries, 1990-2013: quantifying the epidemiological  
363 transition. *Lancet* 2015;386:2145–91.

- 364 9. Maetzel A, Li L. The economic burden of low back pain: a review of studies published  
365 between 1996 and 2001. *Best Practice & Research Clinical Rheumatology*  
366 2002;16(1):23–30. doi:10.1053/berh.2001.0204.
- 367 10. Hartvigsen J, Hancock MJ, Kongsted A, et al. What low back pain is and why we need to  
368 pay attention. *Lancet* 2018;391(10137):2356–67.
- 369 11. Dunn, KM, Hesbaek L, Cassidy JD. Low back pain across the life course. *Best Practice*  
370 *Research and Clinical Rheumatology*, 2013;27(5):591-600. doi:  
371 10.1016/j.berh.2013.09.007.
- 372 12. Hancock MJ, Maher CG, Laslett M, et al. Discussion paper: what happened to the “bio”  
373 in the bio-psycho-social model of low back pain? *European Spine Journal*  
374 2011;20(12):2105–10. 3
- 375 13. Koes BW, van Tulder MW, Thomas S. Diagnosis and treatment of low back pain. *BMJ*  
376 2006;332:1430–1434.
- 377 14. Hoy D, Brooks P, Blyth F, et al. The epidemiology of low back pain. *Best Pract Res Clin*  
378 *Rheumatol* 2010;24:769–781.
- 379 15. Dunn KM, Campbell P, Jordan KP. Long-term trajectories of back pain: cohort study with  
380 7-year follow-up. *BMJ Open* 2013;3:e003838. doi:10.1136/bmjopen-2013- 003838.
- 381 16. Tamcan O, Mannion AF, Eisenring C, et al. The course of chronic and recurrent low back  
382 pain in the general population. *Pain* 2010;150:451–7.
- 383 17. Hestbaek L, Leboeuf-Yde C, Manniche C. Low back pain: what is the long-term course?  
384 A review of studies of general patient populations. *European Spine Journal*  
385 2003;12(2):149–65.
- 386 18. Kolb E, Canjuga M, Bauer GF, et al. Course of back pain across 5 years: a retrospective  
387 cohort study in the general population of Switzerland. *Spine* 2011;36 (4):E268–73.
- 388 19. van Oostrom SH, Verschuren WM, de Vet HC, et al. Ten year course of low back pain in  
389 an adult population-based cohort – the Doetinchem Cohort Study. *European Journal of*

- 390            *Pain* 2011;15(9):993–8.
- 391            20. Hestbaek L, Leboeuf-Yde C, Engberg M, et al. The course of low back pain in a general  
392            population. Results from a 5-year prospective study. *Journal of Manipulative*  
393            *Physiological Therapy* 2003;26(4):213–9.
- 394            21. Itz CJ, Geurts JW, van Kleef Met al. Clinical course of non-specific low back pain: a  
395            systematic review of prospective cohort studies set in primary care. *European Journal*  
396            *of Pain* 2013;17(1):5–15. doi:10.1002/j.1532-2149.2012.00170.x
- 397            22. Ramiro S, Canhao H, Branco JC. EpiReumaPt Protocol— Portuguese epidemiologic study  
398            of the rheumatic diseases. *Acta Reumatológica Portuguesa* 2010;35:384–90.
- 399            23. Rodrigues AM, Gouveia N, da Costa LP, et al. EpiReumaPt - the study of rheumatic and  
400            musculoskeletal diseases in Portugal: a detailed view of the methodology. *Acta*  
401            *Reumatológica Portuguesa* 2015;40:110–24.
- 402            24. Dias S, Rodrigues AM, Gregório MJ, et al. Cohort Profile: The Epidemiology of Chronic  
403            Diseases Cohort (EpiDoC). *International Journal of Epidemiology* 2018;1741–1742j doi:  
404            10.1093/ije/dyy185.
- 405            25. Chou R, Shekelle P. Will this patient develop persistent disabling low back pain? *JAMA*  
406            2010;303:1295–302.
- 407            26. Hendrick P, Milosavljevic S, Hale L, et al. The relationship between physical activity and  
408            low back pain outcomes: a systematic review of observational studies. *European Spine*  
409            *Journal* 2011;20:464–74.
- 410            27. Pinheiro MB, Ferreira ML, Refshauge K, et al. Symptoms of depression as a prognostic  
411            factor for low back pain: a systematic review. *Spine Journal* 2016;16:105–16.
- 412            28. Wertli MM, Eugster R, Held U, et al. Catastrophizing – a prognostic factor for outcome  
413            in patients with low back pain: a systematic review. *Spine Journal* 2014;14:2639–57.
- 414            29. Wertli MM, Rasmussen-Barr E, Weiser S, et al. The role of fear avoidance beliefs as a  
415            prognostic factor for outcome in patients with nonspecific low back pain: a systematic

- 416 review. *Spine Journal* 2014;14:816–36.
- 417 30. Wilkens P, Scheel IB, Grundnes O, et al. Prognostic factors of prolonged disability in  
418 patients with chronic low back pain and lumbar degeneration in primary care: a cohort  
419 study. *Spine Journal* 2013;38:65–74.
- 420 31. Deyo RA, Bryan M, Comstock BA, et al. Trajectories of Symptoms and Function in Older  
421 Adults with Low Back Disorders. *Spine Journal* 2015;40(17):1352-362.
- 422 32. Chen Y, Campbell P, Strauss V, et al. Trajectories and predictors of the long-term course  
423 of low back pain: cohort study with 5-year follow-up. *Pain* 2018;159(2):252–260.
- 424 33. Fries JF, Spitz P, Kraines RG, et al. Measurement of patient outcome in arthritis. *Arthritis*  
425 *& Rheumatology* 1980;23:137–145.
- 426 34. Ferreira LN, Ferreira PL, Pereira LN. Contributos para a Validação da Versão Portuguesa  
427 do EQ-5D. *Acta Médica Portuguesa* 2013;26(6):664-675.
- 428 35. Ferreira LN, Ferreira PL, Pereira LN, et al. The valuation of the EQ-5D in Portugal. *Quality*  
429 *of Life Research* 2014;23(2):413–423.
- 430 36. Zigmond AS, Snaith RP. Hospital anxiety and depression scale (HAD). *Acta Psychiatrica*  
431 *Scandinavica* 1983;67:361–70.
- 432 37. Pais-Ribeiro J, Silva I, Ferreira T, et al. Validation Study of a Portuguese version of the  
433 hospital anxiety and depression scale. *Psychology, Health & Medicine* 2007;12(2):225-  
434 237.
- 435 38. Sterne JA, White IR, Carlin JB, et al. Multiple imputation for missing data in  
436 epidemiological and clinical research: potential and pitfalls. *BMJ* 2009;338:b2393.
- 437 39. Hosmer DW, Lemeshow S. Applied logistic regression. 2nd Edition, New York, John Wiley  
438 & Sons, Inc 2000;doi10.1002/0471722146.
- 439 40. Dunn KM, Jordan K, Croft PR. Characterizing the course of low back pain: a latent class  
440 analysis. *American Journal of Epidemiology* 2006;163:754–61.
- 441 41. Waxman R, Tennant A, Helliwell P. A prospective follow-up study of low back pain in

- 442 the community. *Spine Journal* 2000;25:2085–90.
- 443 42. Thomas E, Silman AJ, Croft, PR, et al. Predicting who develops chronic low back pain in  
444 primary care: a prospective study. *BMJ* 1999;318:1662–7.
- 445 43. Grotle M, Foster NE, Dunn KM, et al. Are prognostic indicators for poor outcome  
446 different for acute and chronic low back pain consulters in primary care? *Pain*  
447 2010;151:790–797.
- 448 44. Carey TS, Garrett JM, Jackman AM. Beyond the good prognosis: examination of an  
449 inception cohort of patients with chronic low back pain. *Spine Journal* 2000;25:115–20.
- 450 45. Costa LC, Maher CG, McAuley JH, et al. Prognosis for patients with chronic low back pain:  
451 inception cohort study. *BMJ* 2009;339:b3829.
- 452 46. Schiottz-Christensen B, Nielsen GL, Hansen VK, et al. Long-term prognosis of acute low  
453 back pain in patients seen in general practice: a 1-year prospective follow-up study.  
454 *Family Practice* 1999;16:223–32.
- 455 47. Dunn, KM, Jordan KP, Croft PR. Contributions of prognostic factors for poor  
456 outcome in primary care low back pain patients. *Eur J Pain* 2011;15(3):313-9.
- 457 48. Foster NE, Thomas E, Bishop A, et al. Distinctiveness of psychological obstacles to  
458 recovery in low back pain patients in primary care. *Pain* 2010;148:398–406.

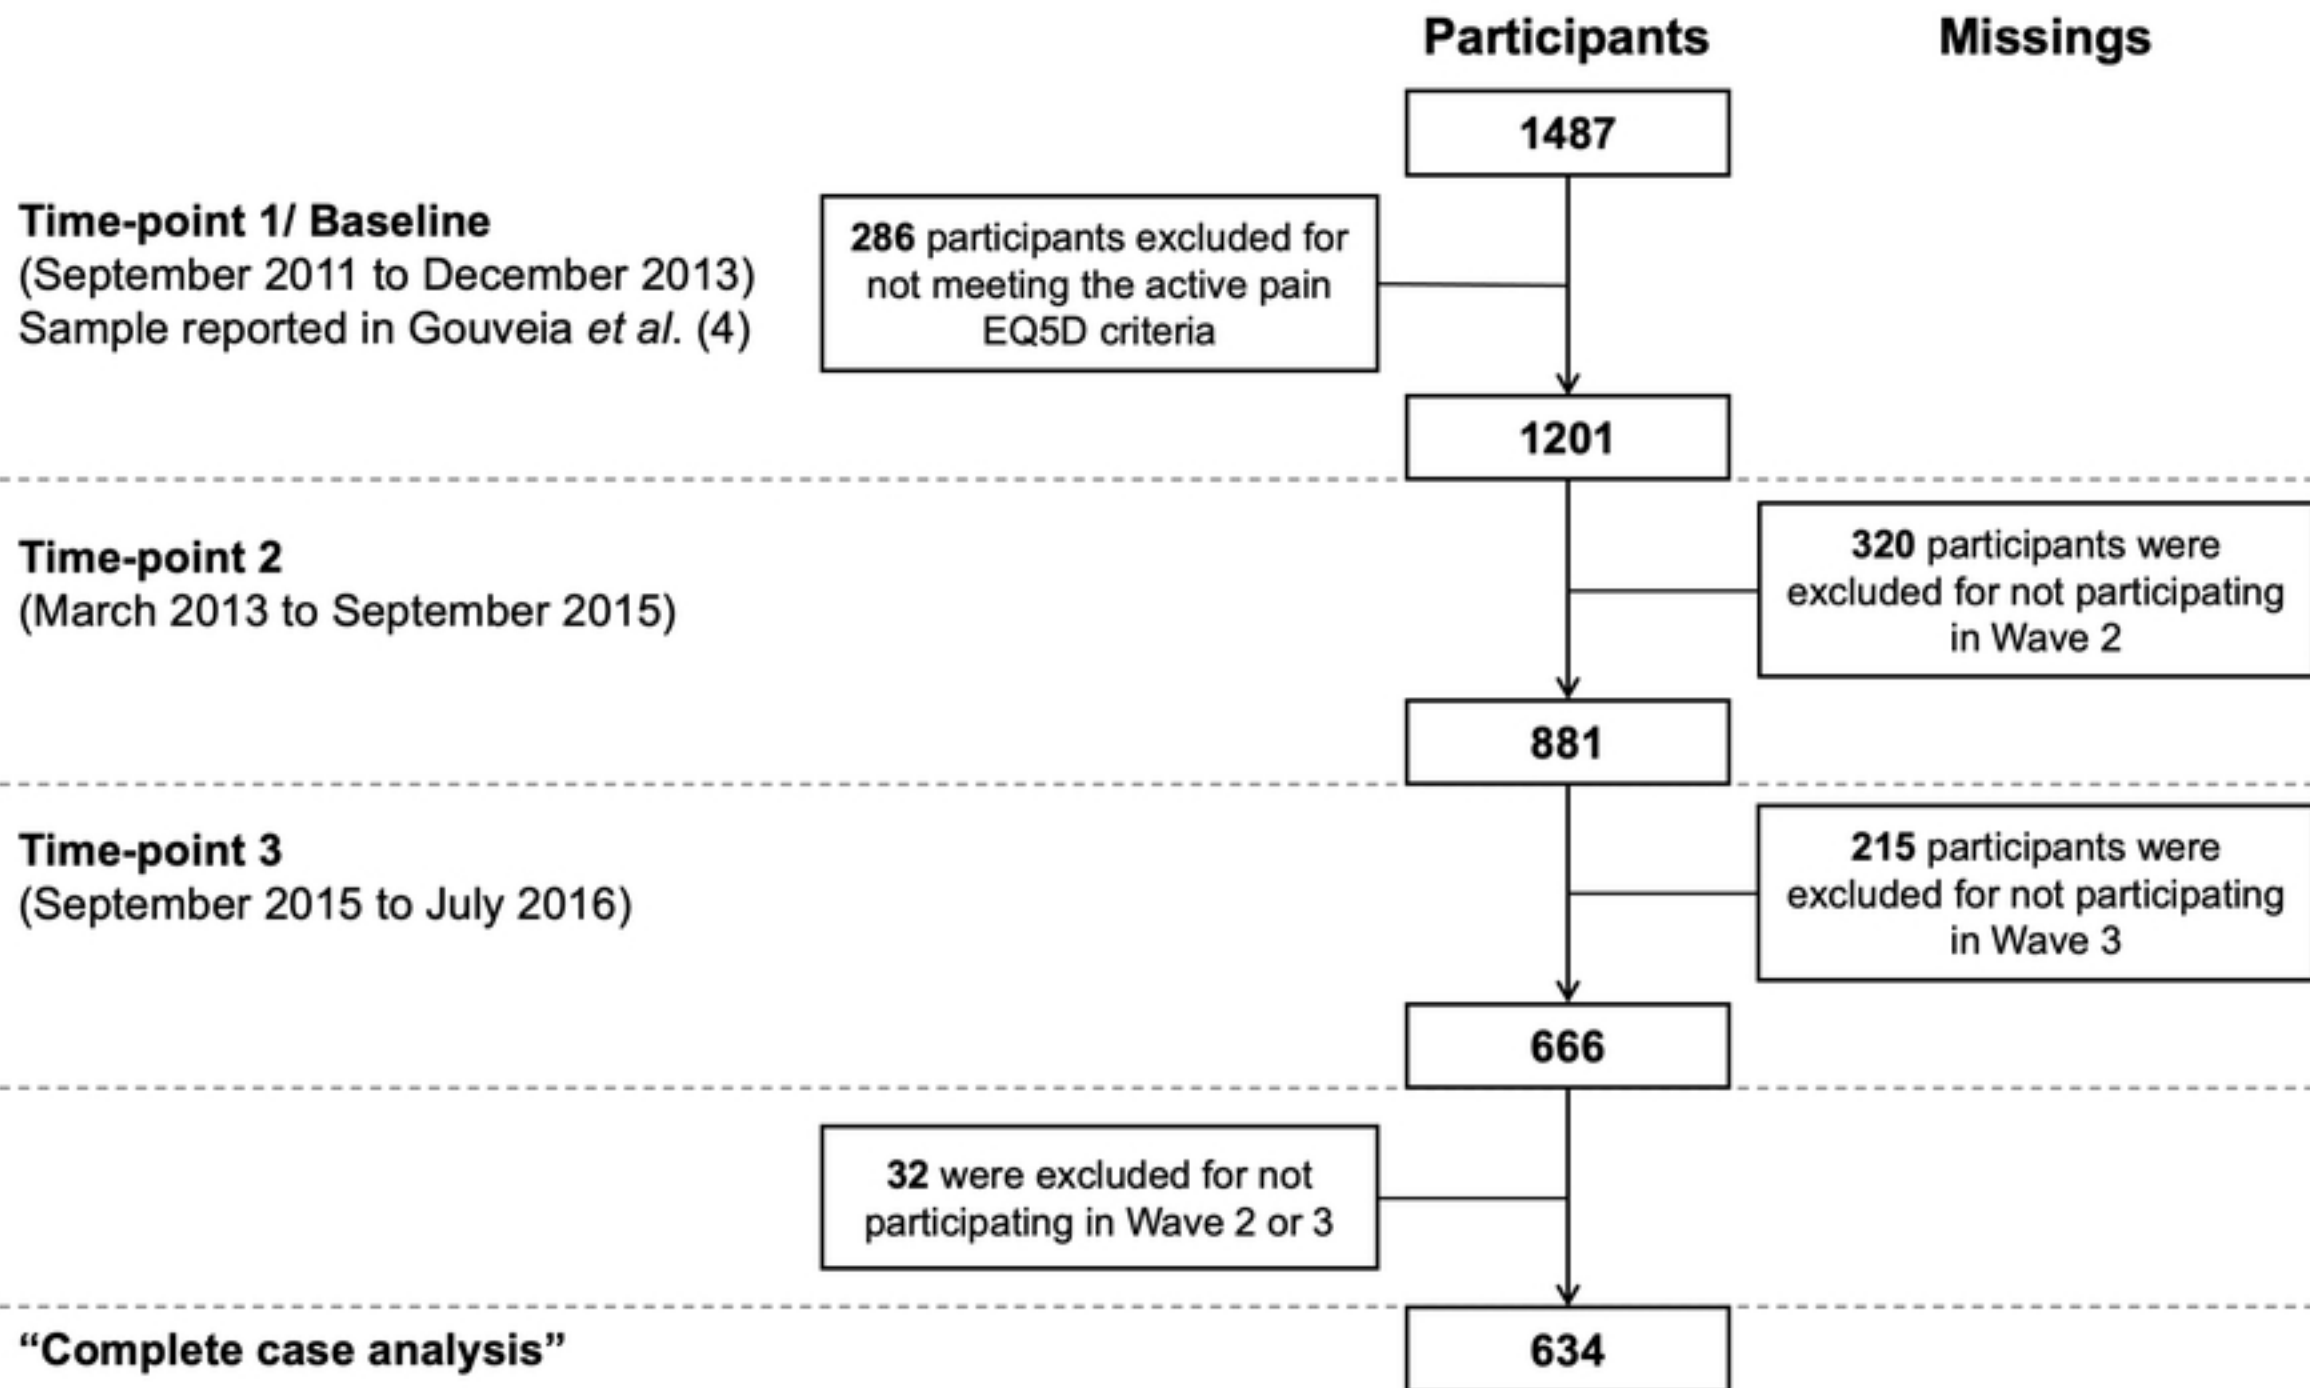

Figure 1
